# Supplementary material for: The dynamic response of Cupriavidus metallidurans CH34 cells and biofilms to silver nanoparticles and the importance of biofilm maturation stage
Source: Research Square preprint supplement (doi:10.21203/rs.3.rs-8079940/v1), 2025-12-24
Supplement: Supplementary file 1 [file c67901f86eaab05b88b48a1f.docx]

**Supplementary material**

0 mg/L


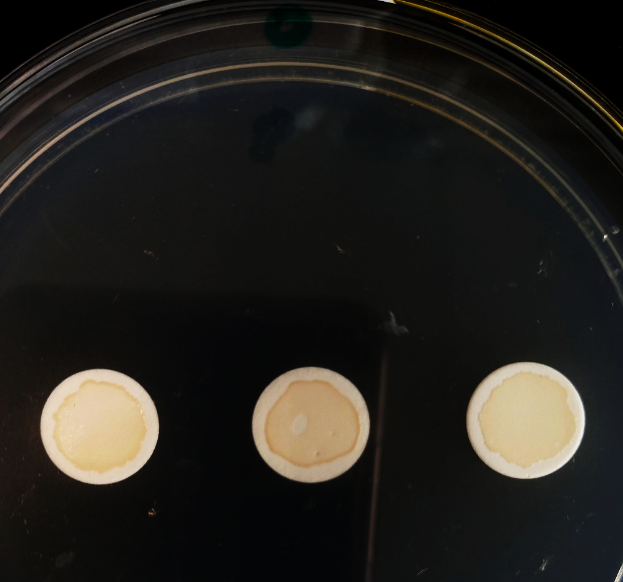

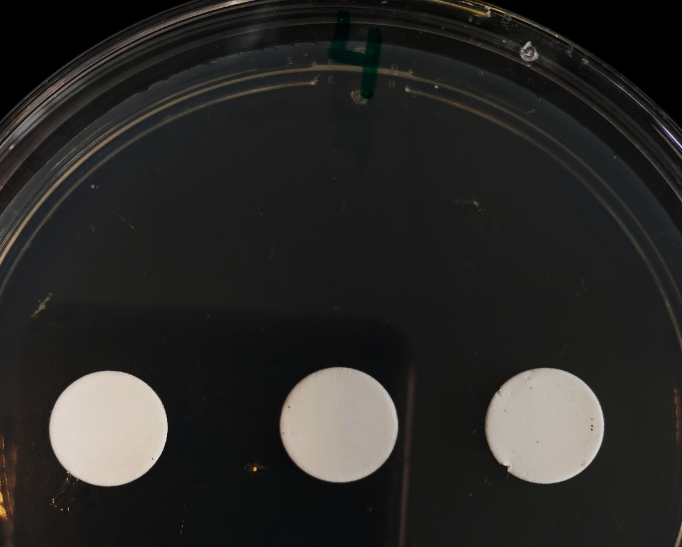


4 mg/L

Supplementary figure 1: Inhibition of biofilm formation on Supor membranes placed on AgNPs-loaded MM284-agar (4 mg/L) for 24 h versus normal biofilm formation in control replicates.

Supplementary figure 2: Absence of cell survival in Supor membranes placed on AgNPs-loaded MM284-agar (4 mg/L) for 24 h versus normal cell count in control replicates.


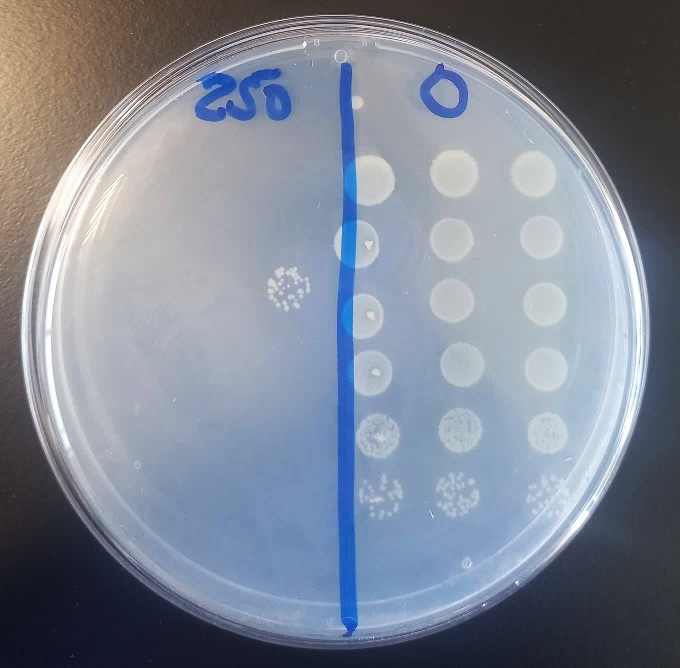


Supplementary figure 3: Planktonic cells of *C. metallidurans* CH34 (≈ 109 CFU/mL) were deposited on Supor membranes on the top of agar plates loaded with 250 mg/L AgNPs and exposed for 24 h. Next, cells were collected from the membranes and plated for cell count. The image shows the results of the CFU count. Left: unexposed replicates. Right: replicates exposed to AgNPs.

Supplementary figure 4: Effect of biofilm age on protein content in control biofilms of *C. metallidurans* CH34

| Supplementary table 1: Proteins representing the age-independent response of *C. metallidurans* CH34 | |
| --- | --- |
| Protein name | Gene name |
| Biopolymer transport protein ExbB | exbB1 Rmet_2278 |
| P-type ATPase CupA (EC 3.6.3.4) | cupA Rmet_3524 |
| N-(2-amino-2-carboxyethyl)-L-glutamate synthase (ACEGA synthase) (EC 2.5.1.140) | sbnA Rmet_1117 |
| Biopolymer transport protein | Rmet_2279 |
| Siderophore synthetase component protein | Rmet_1113 |
| Phenylalanine-4-hydroxylase (EC 1.14.16.1) (Phe-4-monooxygenase) | Rmet_3533 |
| Saccharopine dehydrogenase (NADP+,L-glutamate-forming) | Rmet_3208 |
| Putative iron-sulfur cluster insertion protein ErpA | Rmet_414 |
| ABC-type transporter glycine betaine/L-proline transporter, ATPase subunit, ATPase component: QAT family (EC 3.6.3.32) | Rmet_802 |
| 4-hydroxyphenylpyruvate dioxygenase, oxidoreductase protein (EC 1.13.11.27) | Rmet_4925 |
| Predicted ornithine cyclodeaminase (EC 4.3.1.12) | Rmet_586 |
| Urocanate hydratase (Urocanase) (EC 4.2.1.49) (Imidazolonepropionate hydrolase) | Rmet_2854 |
| Ubiquinol oxidase subunit 2 | Rmet_948 |
| Phasin (PHA-granule associated protein) | Rmet_1200 |
| Siderophore biosynthesis protein | Rmet_1112 |
| Methyltransferase (EC 2.1.1.-) | Rmet_2466 |
| Pyruvate-flavodoxin oxidoreductase (EC 1.2.7.8) | porG Rmet_3396 |
| phosphoenolpyruvate mutase (EC 5.4.2.9) | Rmet_1808 |
| Histone-like DNA-binding protein | Rmet_5558 |
| Cytochrome o ubiquinol oxidase subunit I (EC 1.9.3.1) | Rmet_949 |
| Phasin domain-containing protein | Rmet_5124 |
| DUF3141 domain-containing protein | Rmet_564 |
| Urease subunit alpha (EC 3.5.1.5) (Urea amidohydrolase subunit alpha) | Rmet_961 |
| Hydrogenase maturation factor | Rmet_1539 |
| sulfate adenylyltransferase (EC 2.7.7.4) | Rmet_2812 |
| Hemin-binding periplasmic protein hmuT | Rmet_5376 |
| Methyl-accepting chemotaxis protein, sensory transducer | Rmet_5250 |
| Chemotaxis protein CheA (EC 2.7.13.3) | Rmet_3689 |
| Aconitate hydratase B (EC 4.2.1.3) (EC 4.2.1.99) (2-methylisocitrate dehydratase) | Rmet_5296 |
| Large ribosomal subunit protein bL28 (50S ribosomal protein L28) | Rmet_2870 |
| Cell division protein FtsZ | Rmet_3123 |
| Hydrogenase maturation factor HypB | hypB2 Rmet_1536 |
| Small ribosomal subunit protein bS6 (30S ribosomal protein S6) | rpsF Rmet_1979 |
| Copper chaperone, heavy metal ion binding (Modular protein) | cupC Rmet_3525 |
| Aminotransferase family protein (EC 2.6.1.-) | Rmet_2513 |
| Large ribosomal subunit protein uL30 (50S ribosomal protein L30) | rpmD Rmet_3299 |
| Allophanate hydrolase subunit 1 | Rmet_0062 |
| Probable succinyl-diaminopimelate desuccinylase | dapE Rmet_1610 |
| AtzB (Hydroxyatrazine hydrolase) (EC 3.5.99.3) | atzB Rmet_1186 |
| Flagellin | fliC2 Rmet_5252 |
| Methyl-accepting chemotaxis sensory transducer | Rmet_3683 |
| Large ribosomal subunit protein bL19 (50S ribosomal protein L19) | rplS Rmet_0751 |
| Fused isobutyryl-CoA mutase [Includes: Isobutyryl-CoA mutase (ICM) (EC 5.4.99.13); P-loop GTPase (EC 3.6.5.-) (G-protein chaperone)] | icmF sbm Rmet_0210 |
| ATPase and specificity subunit of ClpA-ClpP ATP-dependent serine protease, chaperone activity | clpA Rmet_2892 |
| 5-methyltetrahydropteroyltriglutamate--homocysteine methyltransferase (EC 2.1.1.14) (Cobalamin-independent methionine synthase) (Methionine synthase, vitamin-B12 independent isozyme) | metE Rmet_4564 |
| Large ribosomal subunit protein uL1 (50S ribosomal protein L1) | rplA Rmet_3337 |
| Large ribosomal subunit protein uL10 (50S ribosomal protein L10) | rplJ Rmet_3336 |
| Signal recognition particle protein (EC 3.6.5.4) (Fifty-four homolog) | ffh Rmet_3094 |
| Acetylornithine deacetylase/succinyl-diaminopimelate desuccinylase related protein | Rmet_3442 |
| Large ribosomal subunit protein uL4 (50S ribosomal protein L4) | rplD Rmet_3316 |
| Large ribosomal subunit protein bL9 (50S ribosomal protein L9) | rplI Rmet_1976 |
| TRAP-type mannitol/chloroaromatic compound transport system, periplasmic component | Rmet_3543 |
| Lipoprotein (Secreted) | Rmet_3281 |
| ABC-type transporter, periplasmic component: HAAT family | livK2 Rmet_2867 |
| ABC-type transporter, periplasmic component | Rmet_3518 |
| Diadenosine tetraphosphate (Ap4A) hydrolase or other HIT (Histidine triad) family hydrolase (EC 3.6.1.17) | Rmet_3238 |
| Penicillin amidase (Peptidase S45) (EC 3.5.1.11) | Rmet_5635 |
| Extracellular ligand-binding receptor | Rmet_1226 |
| Extra-cytoplasmic Solute Receptor | bug Rmet_3086 |
| 4Fe-4S ferredoxin, iron-sulfur binding protein | Rmet_2764 |
| Amidase (EC 3.5.1.4) | Rmet_4787 |
| Glycine-zipper-containing OmpA-like membrane domain-containing protein | Rmet_1704 |
| 2-oxoadipate dioxygenase/decarboxylase (EC 1.13.11.93) (2-hydroxyglutarate synthase) | Rmet_5575 |
| Soluble lytic murein transglycosylase (EC 3.2.1.147) | Rmet_0176 |
| AMP-dependent synthetase and ligase (EC 6.2.1.26) | Rmet_5438 |
| Acyl-CoA synthetase (AMP-forming)/AMP-acid ligase II (EC 6.2.1.-) | Rmet_1863 |
| Extra-cytoplasmatic solute receptor | bug Rmet_4286 |
| sn-glycerol-3-phosphate-binding periplasmic protein UgpB | ugpB Rmet_2055 |
| Metallophosphoesterase | Rmet_0638 |
| Heme-binding HmuY-like protein | Rmet_5374 |
| Copper-binding protein | Rmet_0422 |
| Cytochrome c oxidase subunit 2 (EC 7.1.1.9) | coxB Rmet_0261 |
| Extra-cytoplasmic Solute Receptor | bug Rmet_3076 |
| Microcystinase C (MlrC) | Rmet_5087 |
| TRAP-type transporter, periplasmic component / DctP analogue | Rmet_1874 |
| ABC-type tungstate transport system, permease component | Rmet_0895 |
| Sulfur oxidation protein (SoxX) | soxX Rmet_3419 |
| Deaminase-reductase (RibD domain) | Rmet_5103 |
| Isochorismatase hydrolase | Rmet_5311 |
| DUF4845 domain-containing protein | Rmet_2419 |
| Protease HtpX homolog (EC 3.4.24.-) | htpX Rmet_3464 |
| Leucine/isoleucine/valine transporter subunit, ATP-binding component of ABC superfamily | livF7 Rmet_1858 |
| Metal-dependent amidohydrolase with the TIM-barrel fold | Rmet_4653 |
| Isoquinoline 1-oxidoreductase subunit beta (EC 1.3.99.16) | iorB Rmet_0595 |
| Pyruvate dehydrogenase E1 component (EC 1.2.4.1) | aceE Rmet_4263 |
| ABC-type transporter, periplasmic component: HAAT family | Rmet_1862 |
| Thiol-disulfide isomerase-like and thioredoxin-like protein | Rmet_0233 |
| Phenylacetate--CoA ligase (EC 6.2.1.30) | paaK Rmet_0220 |
| Amino-acid-binding periplasmic abc transporter protein | Rmet_0690 |
| KDG kinase | kdgK Rmet_4769 |
| Outer membrane biogenesis protein (YhjG-like) | Rmet_2640 |
| Extra-cytoplasmic solute receptor protein | bug Rmet_3900 |
| Dihydrofolate reductase (EC 1.5.1.3) | folA Rmet_2569 |
| Amino acid ABC transporter permease | Rmet_4584 |
| Ubiquinol-cytochrome c reductase iron-sulfur subunit (EC 7.1.1.8) | petA Rmet_3230 |
| Extra-cytoplasmic solute receptor protein | bug Rmet_5616 |
